# Supplementary material for: Redox Biomarker Baseline Levels in Cattle Tissues and Their Relationships with Meat Quality
Source: MDPI journal article supplement (doi:10.3390/antiox10060958), 2021-06-15
Supplement: s1 [file s1]

**Supplementary Table S1.** Bulls ration composition

| Diet composition    |                              |        |                       |
|---------------------|------------------------------|--------|-----------------------|
| 60% of total ration | corn silage                  | 65%    |                       |
|                     | alfalfa hay                  | 35%    |                       |
| 40% of total ration | corn grains                  | 39%    |                       |
|                     | wheat bran                   | 12%    |                       |
|                     | soybean meal                 | 10%    |                       |
|                     | barley grains                | 26%    |                       |
|                     | ddgs                         | 11%    |                       |
|                     | minerals and vitamins premix | 2%     |                       |
|                     |                              | Ca     | 19%                   |
|                     |                              | P      | 3,20%                 |
|                     |                              | Mg     | 2,80%                 |
|                     |                              | Na     | 8%                    |
|                     |                              | Vit A  | 520000 I.U./kg premix |
|                     |                              | Vit D3 | 72000 I.U./kg premix  |
|                     |                              | Vit E  | 4000 mg/kg premix     |
|                     |                              | Zn     | 2400 mg/kg premix     |
|                     |                              | Mn     | 2400 mg/kg premix     |
|                     |                              | I      | 120 mg/kg premix      |
|                     |                              | Co     | 12 mg/kg premix       |
|                     |                              | Se     | 12 mg/kg premix       |
